# Supplementary material for: Intelligent gold nanostars for in vivo CT imaging and catalase-enhanced synergistic photodynamic & photothermal tumor therapy
Source: PubMed Central journal article supplement (PMC6735389; doi:10.7150/thno.33015), 2019-07-13
Supplement: thnov09p5424s1.pdf [file thnov09p5424s1.pdf]

## **Intelligent gold nanostars for *in vivo* CT imaging and catalase-enhanced synergistic photodynamic & photothermal tumor therapy**

Lin Zhang<sup>a</sup>, Xiao-Quan Yang<sup>a,b</sup>, Jian-Shuang Wei<sup>a</sup>, Xing Li<sup>a</sup>, Huan Wang<sup>c</sup>, Yuan-Di Zhao<sup>a,b,\*</sup>

<sup>a</sup> Britton Chance Center for Biomedical Photonics at Wuhan National Laboratory for Optoelectronics–Hubei Bioinformatics & Molecular Imaging Key Laboratory, Collaborative Innovation Center for Biomedical Engineering, College of Life Science and Technology, Huazhong University of Science and Technology, Wuhan 430074, Hubei, P. R. China

<sup>b</sup> Key Laboratory of Biomedical Photonics (HUST), Ministry of Education, Huazhong University of Science and Technology, Wuhan 430074, Hubei, P. R. China

<sup>c</sup> Division of Endocrinology, Diabetes and Nutrition University of Maryland, School of Medicine Baltimore, MD 21201, USA

\* Corresponding author.

Tel/Fax: +86-27-8779-2202. Email address: zydi@mail.hust.edu.cn (Y.D. Zhao).

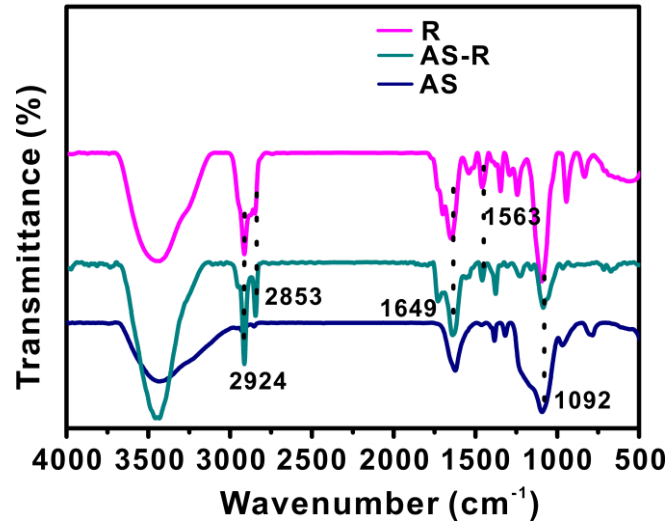

**Figure S1.** Infrared absorption spectra of AS-R, AS, and R.

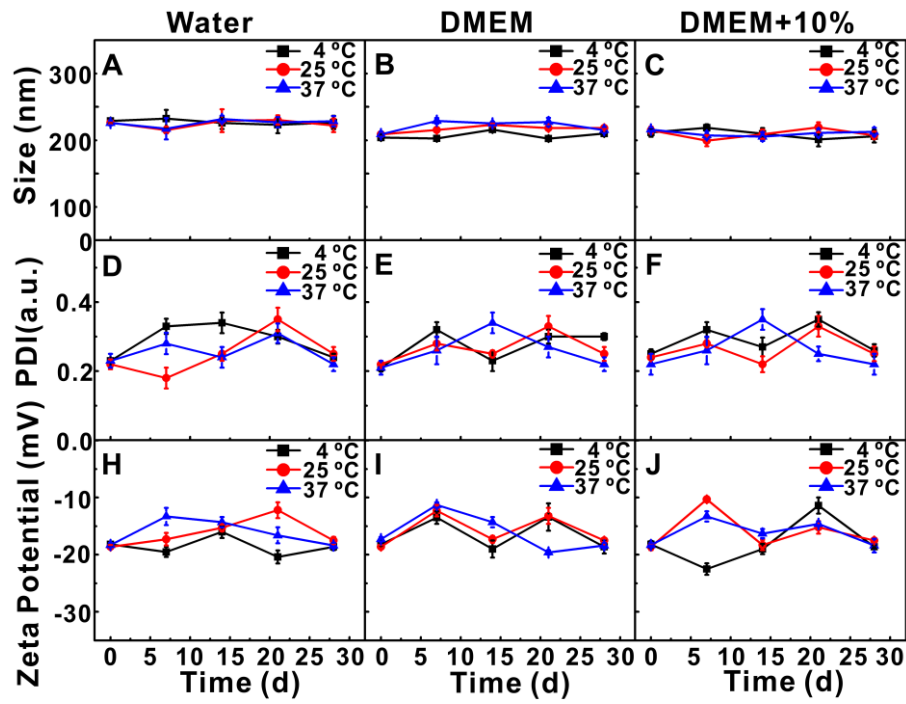

**Figure S2.** The particle size (A-C), dispersion PDI (D-F) and zeta potential of the ASCE-R probe in water, DMEM, and DMEM+10% serum changed with time (H-J).

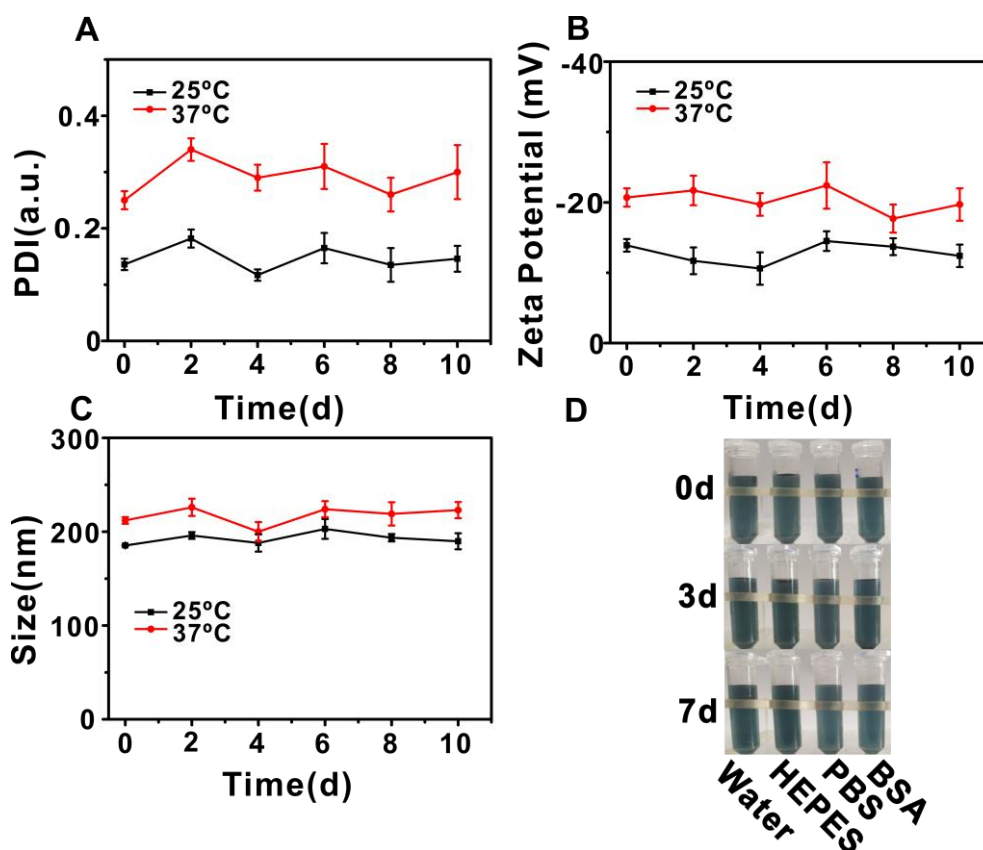

**Figure S3.** Changes in size (A), zeta potential (B) and PDI (C) of ASCE-R in PBS (pH=7.4) at 25 and 37 °C (n=3); digital photograph of ASCE-R in water, HEPES, PBS (pH=7.4), and bovine serum albumin at changed days (D).

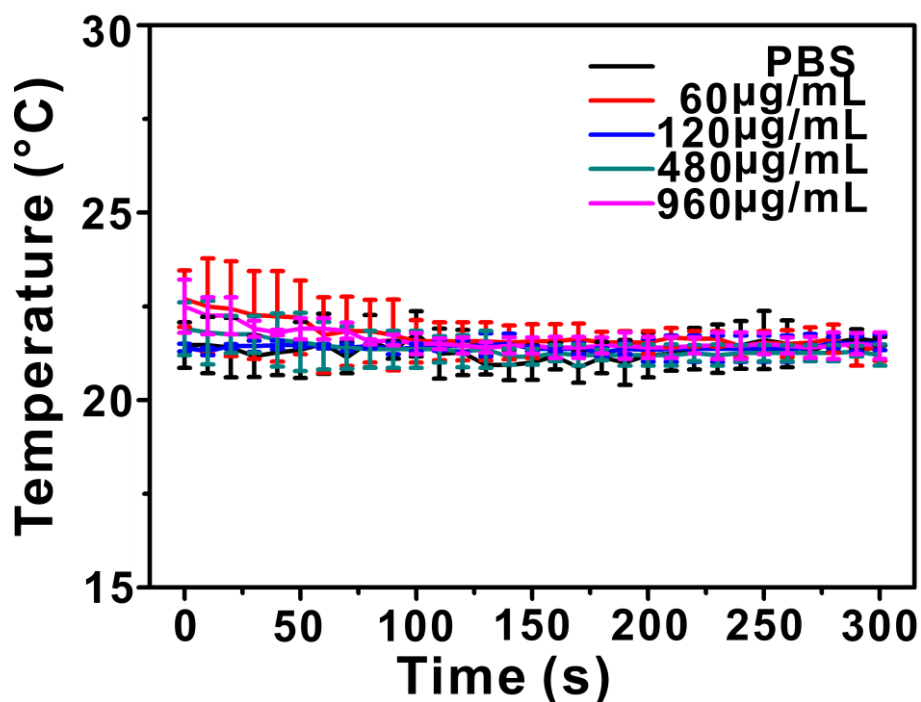

**Figure S4.** Temperature rise curves of ASCE-R with different concentrations irradiated by 660 nm laser (1.0 W/cm<sup>2</sup>).

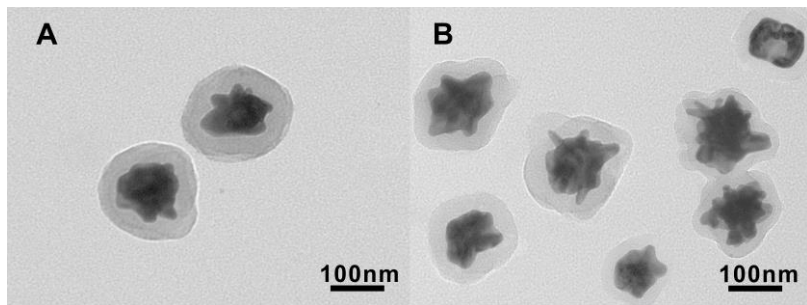

**Figure S5.** TEM of probe before (A) and after (B) irradiation at 808 nm laser ( $1 \text{ W/cm}^2$ ) for 3min, 660 nm laser ( $0.1 \text{ W/cm}^2$ ) for 8 min.
